# Supplementary material for: A note on change in persistence of U.S. city prices
Source: publisher site journal article supplement (doi:10.1515/snde-2019-0051), 2020-12-21
Supplement: Supplementary file 1 [file data.xls]

## Sheet: Hoja1
Year	Atlanta	Baltimore	Boston	Chicago	Cincinnati	Cleveland	Detroit	Houston	Kansas City	Los Angeles	Minneapolis	New York	Philadelphia	Pittsburgh	Portland	San Francisco	Seattle	St. Louis	Washington DC	Var19	Var20
1918	16.6	14.3	15.7	14.9	14.5	13.2	15.7	14.5	16.1	14.4	14.1	15.1	15.5	14.8	15.1	12.9	13.7	14.8	16.3	15.1
1919	19.3	16.3	18	17.3	16.9	15.5	18.2	16.9	18.5	17	16	17.7	17.9	17	17.7	15	16.5	16.8	17.8	17.3
1920	21.9	18.3	20.6	19.8	19.3	18.3	21.8	19.2	21.7	19.9	18.6	20.2	20.5	19.5	20	17	18.8	19.9	20	20
1921	19	16.2	18.3	18	16.5	16.6	19	17	19.2	18.6	16.7	18.1	18.2	17.5	17.3	15.3	16.7	17.4	17.6	17.9
1922	17.5	15.4	17	17	15.5	15.1	17.4	15.9	17.5	18.1	15.8	17.2	17.2	16.3	16.4	14.6	15.6	16.3	16.7	16.8
1923	17.6	15.7	17.4	17.4	15.9	15.7	18	15.9	17.4	18.3	15.9	17.5	17.6	16.6	16.6	14.7	15.5	16.7	16.9	17.1
1924	17.3	15.7	17.4	17.7	16	15.7	18	15.8	17.3	18.4	15.8	17.5	17.7	16.8	16.5	14.7	15.5	16.8	16.9	17.1
1925	17.9	16.2	17.9	18.2	16.8	16	18.2	16.2	17.5	18.4	15.9	17.9	18.4	17.4	16.6	15.1	15.8	17.3	17.3	17.5
1926	18.1	16.4	18.2	18.3	17.1	16.1	18.3	16	17.5	17.9	16.1	18.1	18.7	17.5	16.4	15	15.8	17.6	17.5	17.7
1927	17.5	16	17.9	17.9	16.8	15.8	17.9	15.7	17	17.6	15.7	17.9	18.3	17.2	16.2	14.9	15.5	17.3	17	17.4
1928	17.3	15.9	17.7	17.7	16.7	15.6	17.5	15.6	16.7	17.3	15.5	17.8	18	17.1	16	14.8	15.4	16.9	16.9	17.1
1929	17.2	15.9	17.8	17.6	16.9	15.5	17.6	15.7	16.8	17.3	15.6	17.9	17.8	17.1	15.8	14.9	15.5	17.1	16.8	17.1
1930	16.5	15.6	17.3	17.2	16.7	15.2	16.9	15.3	16.5	16.7	15.3	17.4	17.4	16.5	15.5	14.5	15.2	16.7	16.5	16.7
1931	14.9	14.4	15.8	15.6	15.1	13.7	14.8	13.9	15.5	15.1	14.2	16.1	15.9	15	14	13.3	13.8	15	15.5	15.2
1932	13.3	13.1	14.2	13.7	13.3	12.4	12.8	12.3	13.9	13.6	12.9	14.7	14.2	13.3	12.7	12.3	12.6	13.4	14.3	13.7
1933	12.6	12.5	13.6	12.6	12.8	11.8	12.1	11.8	13.3	12.8	12.2	13.9	13.5	12.5	12.1	11.8	12	12.8	13.9	13
1934	13.2	13	14.1	12.8	13.3	12.2	12.8	12.3	13.7	12.9	12.6	14.3	14.2	12.9	12.5	12.1	12.3	13.3	14.3	13.4
1935	13.5	13.3	14.3	13.4	13.7	12.7	13.4	12.7	14	13.3	13	14.5	14.3	13.3	12.9	12.4	12.6	13.7	14.6	13.7
1936	13.7	13.4	14.3	13.5	13.9	12.8	13.8	12.8	14.1	13.5	13.2	14.5	14.5	13.5	13.2	12.4	12.7	13.8	14.7	13.9
1937	14.1	13.8	14.8	14.2	14.3	13.4	14.7	13.3	14.6	14.2	13.8	14.8	14.9	14	13.9	12.8	13.4	14.3	15	14.4
1938	13.7	13.5	14.3	13.9	14	13.3	14.4	13.3	14.3	14	13.6	14.6	14.5	13.7	13.7	12.8	13.2	13.9	14.7	14.1
1939	13.6	13.4	14.1	13.7	13.7	13.2	14	13.2	14.1	13.9	13.5	14.5	14.3	13.4	13.6	12.6	13.2	13.8	14.6	13.9
1940	13.6	13.5	14.3	13.8	13.8	13.2	14.1	13.2	14	13.9	13.5	14.7	14.3	13.6	13.6	12.7	13.2	13.9	14.7	14
1941	14.4	14.3	14.9	14.5	14.5	14	15	13.8	14.7	14.7	14.2	15.3	15	14.4	14.4	13.4	14	14.6	15.3	14.7
1942	15.9	16	16.5	16	16.2	15.5	16.7	15.2	16.3	16.5	15.5	16.7	16.7	15.8	16.5	15	15.8	16.2	17	16.3
1943	17	17	17.4	16.9	17.1	16.6	17.5	16	17.3	17.3	16.2	17.9	17.8	16.8	17.5	16	16.7	17	18.1	17.3
1944	17.3	17.3	17.6	17.1	17.5	16.9	17.8	16.2	17.6	17.6	16.4	18.4	18	17.2	17.7	16.4	16.9	17.3	18.4	17.6
1945	17.9	17.8	17.9	17.5	17.8	17.2	18.3	16.6	18.1	18.1	16.7	18.9	18.5	17.6	18.2	16.8	17.3	17.6	18.9	18
1946	19.3	19.2	19.4	19	19.3	18.5	19.9	17.9	19.3	19.5	18.2	20.7	20.1	19.1	19.5	18.2	18.6	19.1	20.6	19.5
1947	22.3	22.1	22.1	22.1	22.4	21.2	22.7	21	21.9	22	21	23.2	23	22.2	22.1	20.6	21.1	22.2	23.2	22.3
1948	23.8	23.8	23.9	24	24.1	23	24.5	22.7	23.6	23.6	22.9	24.7	24.8	23.8	24.1	22	22.8	23.9	24.6	24.1
1949	23.8	23.7	23.6	24	23.7	22.6	24.2	22.7	23.3	23.6	22.7	24.5	24.5	23.5	23.8	22	22.7	23.6	24.6	23.8
1950	24.1	23.9	23.9	24.2	23.9	22.8	24.6	23.4	23.7	23.7	22.9	24.6	24.7	23.7	24.3	22	23.1	23.9	24.9	24.1
1951	26.4	25.6	25.5	26.1	25.8	24.6	26.5	25.2	25.5	25.7	24.6	26.5	27	25.6	26.2	23.8	24.8	25.9	26.6	26
1952	27	26.3	26	26.7	26.3	25.2	27.1	25.5	26.3	26.5	25.4	26.9	27.5	26.1	26.8	24.6	25.5	26.7	27.3	26.5
1953	27.3	26.6	26.1	26.9	26.7	25.4	27.6	25.8	26.4	26.7	25.7	27.1	27.6	26.3	26.9	25	25.8	27	27.5	26.7
1954	27.2	26.7	26.3	27.4	26.7	25.7	27.7	25.8	26.5	26.7	25.9	27.2	27.9	26.5	26.9	25.1	25.8	27.1	27.5	26.9
1955	27.1	26.7	26.4	27.5	26.6	25.7	27.7	25.7	26.5	26.7	25.9	27.1	27.9	26.3	26.8	24.9	25.9	27	27.4	26.8
1956	27.5	27.1	27.1	27.9	27.1	26.2	28.2	26.1	26.9	27.1	26	27.5	28.2	27	27.5	25.5	26.2	27.2	27.7	27.2
1957	28.3	28.1	28.1	28.8	28	27.2	29	26.9	27.8	28	26.9	28.4	29.1	27.8	28.4	26.5	27.3	28.1	28.6	28.1
1958	29	28.9	28.9	29.7	28.6	27.8	29.4	27.3	28.5	28.9	27.6	29.2	29.7	28.7	29	27.5	27.9	29	29.3	28.9
1959	29.2	29.4	29.1	29.9	28.8	27.9	29.4	27.6	28.9	29.4	27.9	29.6	30	29	29.3	28	28.5	29.4	29.4	29.1
1960	29.6	29.8	29.8	30.4	29.1	28.3	29.7	27.8	29.3	30	28.3	30.2	30.6	29.7	29.8	28.6	28.8	29.5	29.7	29.6
1961	29.7	30.1	30.2	30.5	29.2	28.5	29.8	28	29.6	30.3	28.6	30.5	30.9	29.9	30.1	28.9	29.3	30	30.1	29.9
1962	30	30.3	30.8	30.8	29.5	28.6	29.9	28.5	30.1	30.7	29	30.9	31.2	30.2	30.2	29.4	29.7	30.3	30.4	30.2
1963	30.3	30.8	31.4	31.1	29.8	28.9	30.2	28.8	30.4	31.1	29.4	31.6	31.8	30.5	30.8	29.8	30.2	30.6	30.9	30.6
1964	30.8	31.1	31.9	31.3	30.3	29.1	30.4	29.2	31.2	31.7	29.7	32.1	32.3	30.9	31.5	30.2	30.6	31.2	31.4	31
1965	31.2	31.6	32.5	31.7	30.5	29.6	31.2	29.6	32.2	32.4	30.1	32.6	32.8	31.4	32.3	30.8	31	31.7	31.9	31.5
1966	32.2	32.7	33.6	32.6	31.4	30.3	32.5	30.4	33	33	30.8	33.7	33.7	32.2	33.3	31.6	31.9	32.7	33	32.4
1967	33.2	33.4	34.4	33.5	32.3	31.2	33.6	31.2	33.7	33.8	31.8	34.6	34.6	32.8	34.2	32.5	32.8	33.7	33.9	33.4
1968	34.5	34.8	35.8	34.9	33.9	33	35.1	32.5	35	35.2	33.3	36.1	36.3	34.3	35.4	34	34.1	35	35.5	34.8
1969	36.5	36.9	37.8	36.8	35.5	34.9	37.2	34.6	36.9	36.8	35	38.3	38.2	36.2	37.1	35.8	35.8	36.8	37.7	36.7
1970	38.6	39.1	40.2	38.9	37.4	37.2	39.5	36.4	39	38.7	37.4	41.2	40.8	38.1	38.7	37.7	37.4	38.8	39.8	38.8
1971	40.4	41.3	42.2	40.4	39	38.3	40.9	37.7	40.6	40.1	38.7	43.6	42.7	39.8	39.7	39.1	38.2	40.3	41.6	40.5
1972	41.6	42.2	43.7	41.6	40.3	39.5	42.5	39	41.8	41.4	39.9	45.5	44	41.1	40.8	40.4	39.3	41.2	43	41.8
1973	44.3	45.1	46.3	44.2	42.7	41.8	45.2	41.2	43.9	43.7	42.3	48.3	46.9	43.6	43.5	42.8	41.8	43.5	45.7	44.4
1974	49.2	51	51.2	48.9	47.3	46.1	50.1	46.1	48.6	48.2	47.2	53.5	52.5	48.3	48.8	47	46.4	47.9	50.8	49.3
1975	53.6	55.2	55.8	52.8	51.8	50.2	53.9	51.4	53.2	53.3	51.2	57.6	56.8	52.4	53.5	51.8	51.1	52.6	54.7	53.8
1976	56.1	58.1	60	55.3	55	52.7	56.8	55.3	56.1	56.9	54.4	61	59.7	55.2	57	54.6	54	55.6	58	56.9
1977	59.6	62.2	63.1	58.8	58.9	56.3	60.7	59.3	60	60.8	58.2	64.2	63.5	58.9	61.6	58.8	58.3	59.5	62	60.6
1978	63.9	66.7	66.4	63.8	64.3	60.5	65.3	64.9	64.6	65.3	63.5	67.8	67.3	64.1	67.8	64.3	63.9	64.5	66.7	65.2
1979	70.5	73	73.2	71.8	72.3	68.5	73.6	73.5	73.8	72.3	70.8	73.7	73.9	71.2	77	69.8	71	72.7	74	72.6
1980	80.3	83.7	82.6	82.2	82.1	78.9	85.3	82.7	83.6	83.7	78.9	82.1	83.6	81	87.2	80.4	82.7	82.5	82.9	82.4
1981	90.2	91.5	91.8	90	87.9	87.2	93.2	91	90.5	91.9	88.6	90.1	92.1	89.3	95	90.8	91.8	90.1	90.5	90.9
1982	96	95.6	95.5	96.2	94.9	94	97	97.3	95	97.3	97.4	95.3	96.6	94.4	98	97.6	97.7	96.6	95.5	96.5
1983	99.9	99.9	99.8	100	100.8	101.2	99.8	100	100.5	99.1	99.5	99.8	99.4	101.1	99.1	98.4	99.3	100.1	99.8	99.6
1984	104.1	104.5	104.7	103.8	104.3	104.8	103.2	102.7	104.5	103.6	103.1	104.8	104.1	104.5	102.8	104	103	103.3	104.6	103.9
1985	108.9	108.2	109.4	107.7	106.6	107.8	106.8	104.9	107.7	108.4	107	108.7	108.8	106.9	106.7	108.4	105.6	107.1	109	107.6
1986	112.2	110.9	112.2	110	107.6	109.4	108.3	103.9	108.7	111.9	108.4	112.3	111.5	108.2	108.2	111.6	106.7	108.6	112.2	109.6
1987	116.5	114.2	117.1	114.5	111.9	112.7	111.7	106.5	113.1	116.7	111.6	118	116.8	111.4	110.9	115.4	109.2	112.2	116.2	113.6
1988	120.4	119.3	124.2	119	116.1	116.7	116.1	109.5	117.4	122.1	117.2	123.7	122.4	114.9	114.7	120.5	112.8	115.7	121	118.3
1989	126.1	124.5	131.3	125	120.9	122.7	122.3	114.1	121.6	128.3	122	130.6	128.3	120.1	120.4	126.4	118.1	121.8	128	124
1990	131.7	130.8	138.9	131.7	126.5	129	128.6	120.6	126	135.9	127	138.5	135.8	126.2	127.4	132.1	126.8	128.1	135.6	130.7
1991	135.9	136.4	145	137	131.4	134.2	133.1	125.1	131.2	141.4	130.4	144.8	142.2	131.3	133.9	137.9	134.1	132.1	141.2	136.2
1992	138.5	140.1	148.6	141.1	134.1	136.8	135.9	129.1	134.3	146.5	135	150	146.6	136	139.8	142.5	139	134.7	144.7	140.3
1993	143.4	143.1	152.9	145.4	137.8	140.3	139.6	133.4	138.1	150.3	139.2	154.5	150.2	139.9	144.7	146.3	142.9	137.5	149.3	144.5
1994	146.7	146.9	154.9	148.6	142.4	144.4	144	137.9	141.3	152.3	143.6	158.2	154.6	144.6	148.9	148.7	147.8	141.3	152.2	148.2
1995	150.9	150.7	158.6	153.3	146.2	147.9	148.6	139.8	145.3	154.6	147	162.2	158.7	149.2	153.2	151.6	152.3	145.2	155.3	152.4
1996	156	154.2	163.3	157.4	149.6	152	152.5	142.7	151.6	157.5	151.9	166.9	162.8	153.2	158.6	155.1	157.5	149.6	159.6	156.9
1997	158.9	156.4	167.9	161.7	152.1	156.1	156.3	145.4	155.8	160	155.4	170.8	166.5	157	164	160.4	163	152.9	162.4	160.5
